# Supplementary material for: Hierarchically porous LiFePO4/nitrogen-doped carbon nanotubes composite as a cathode for lithium ion batteries
Source: Royal Society of Chemistry journal article supplement (doi:10.1039/c2jm30380a), 2012-01-01
Supplement: c2jm30380a.pdf [file c2jm30380a.pdf]

## Electronic Supplementary Information

---

### Hierarchically Porous $\text{LiFePO}_4$ /Nitrogen-doped Carbon Nanotube Composite as Cathode for Lithium Ion Batteries

Jinli Yang,<sup>a</sup> Jiajun Wang,<sup>a</sup> Xifei Li,<sup>a</sup> Dongniu Wang,<sup>a</sup> Jian Liu,<sup>a</sup> G. Liang,<sup>b</sup> M. Gauthier,<sup>b</sup> Yongliang Li,<sup>a</sup> Dongsheng Geng,<sup>a</sup> Ruying Li<sup>a</sup> and Xueliang Sun<sup>\*a</sup>

*a* Department of Mechanical and Materials Engineering, The University of Western Ontario, ON, Canada N6A 5B9. Fax: +1-519-661-3020; Tel: +1-519-661-2111 ext. 87759; E-mail: xsun@eng.uwo.ca

*b* Phostech Lithium Inc., 1475, rue Marie-Victorin, St-Bruno, QC, Canada J3V 6B7

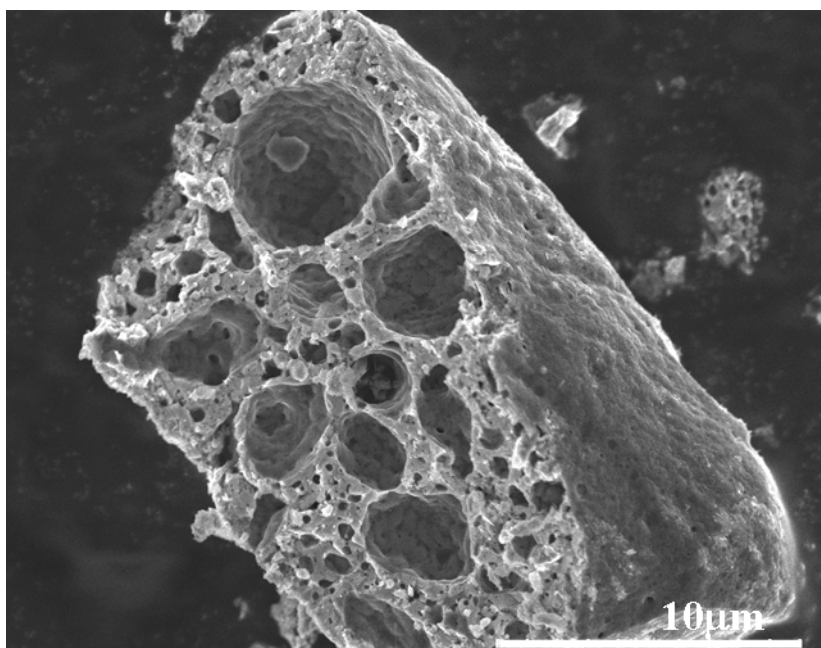

**Figure S1.** The cross-sectional image of the cracked  $\text{LiFePO}_4$  particle

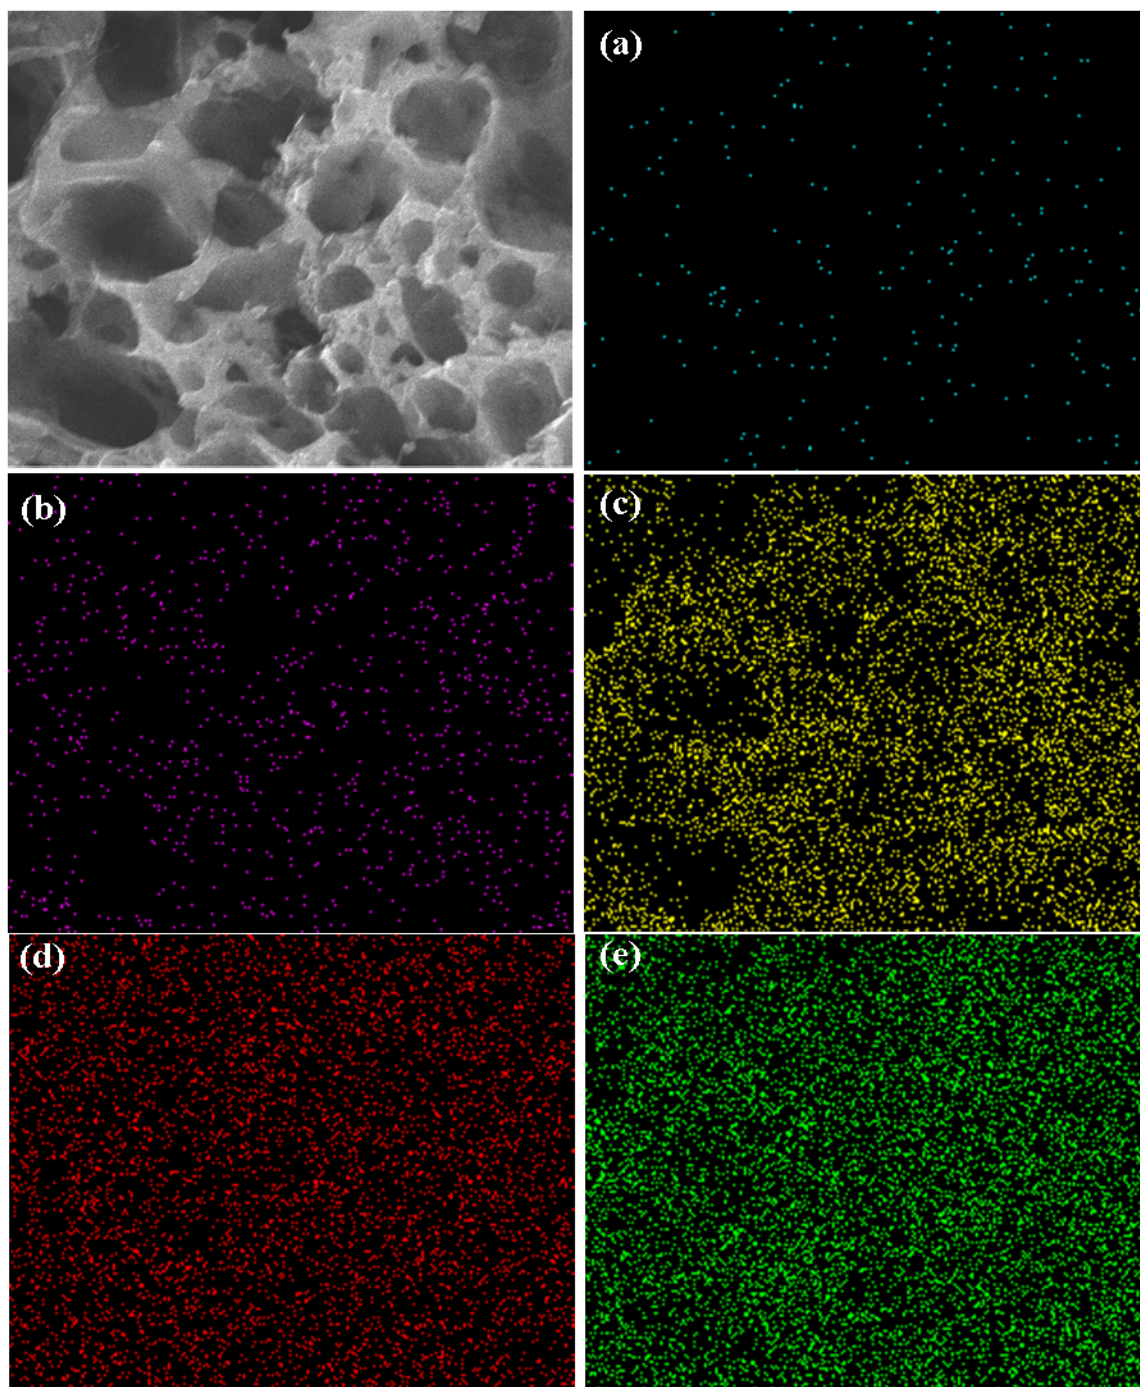

**Figure S2.**Elements mapping in  $\text{LiFePO}_4/\text{N-CNTs}$  composites: (a) N element; (b) C element; (c) O element; (d) Fe element; (e) P element
